# Supplementary material for: Metatranscriptomics-guided discovery and characterization of a polyphenol-metabolizing gut microbial enzyme
Source: PubMed Central journal article supplement (PMC11585353; doi:10.1016/j.chom.2024.10.002), 2024-10-28
Supplement: NIHMS2033475-supplement-1.pdf [file NIHMS2033475-supplement-1.pdf]

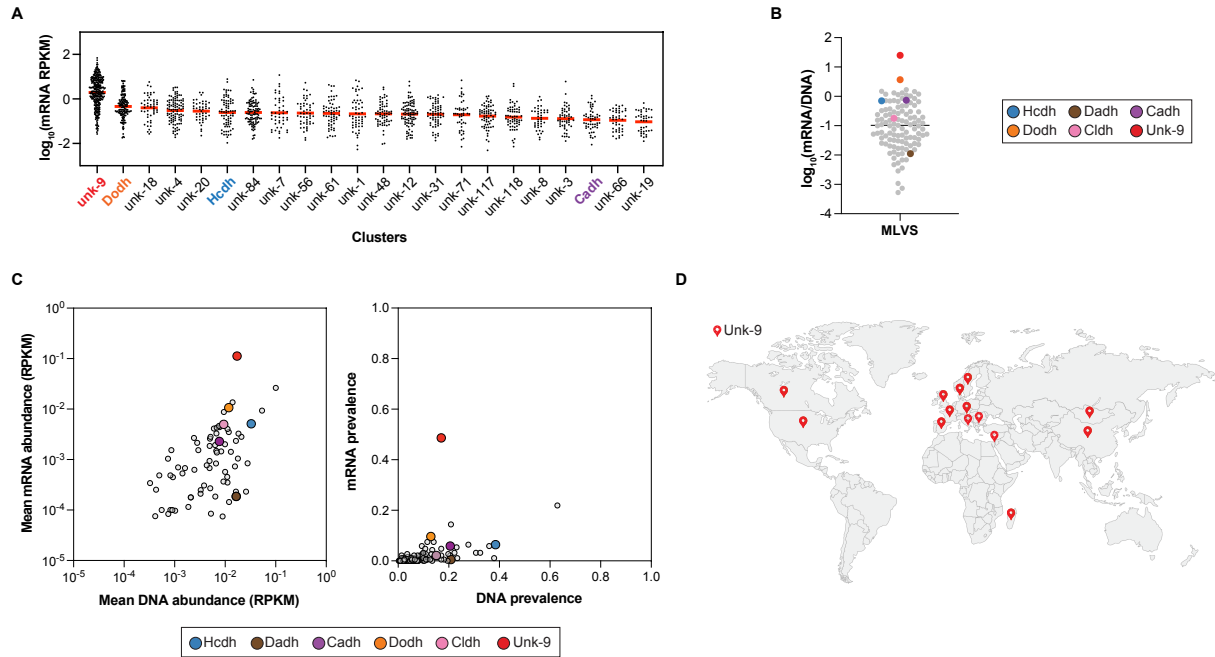

23  
 24 Figure S2. Quantitative MGX and MTX analysis of catechol dehydroxylase clusters, related to Figure 2.  
 25 (A) The mRNA abundance of each catechol dehydroxylase clusters per individual in the MLVS dataset  
 26 (clusters with prevalence > 0.1). (B) Average mRNA/DNA ratio for each catechol dehydroxylase cluster  
 27 among the MLVS cohort. Characterized clusters and Unk-9 cluster are highlighted by color. Line represents  
 28 the median. (C) Analysis of DNA and mRNA abundance and prevalence of catechol dehydroxylase clusters  
 29 using the HMP2 datasets (healthy participants). (D) Global distribution of Unk-9 sequences in MAGs  
 30 reconstructed from human fecal metagenomic samples. The countries from which Unk-9 encoding MAGs  
 31 were sampled are indicated with red marks.  
 32  
 33

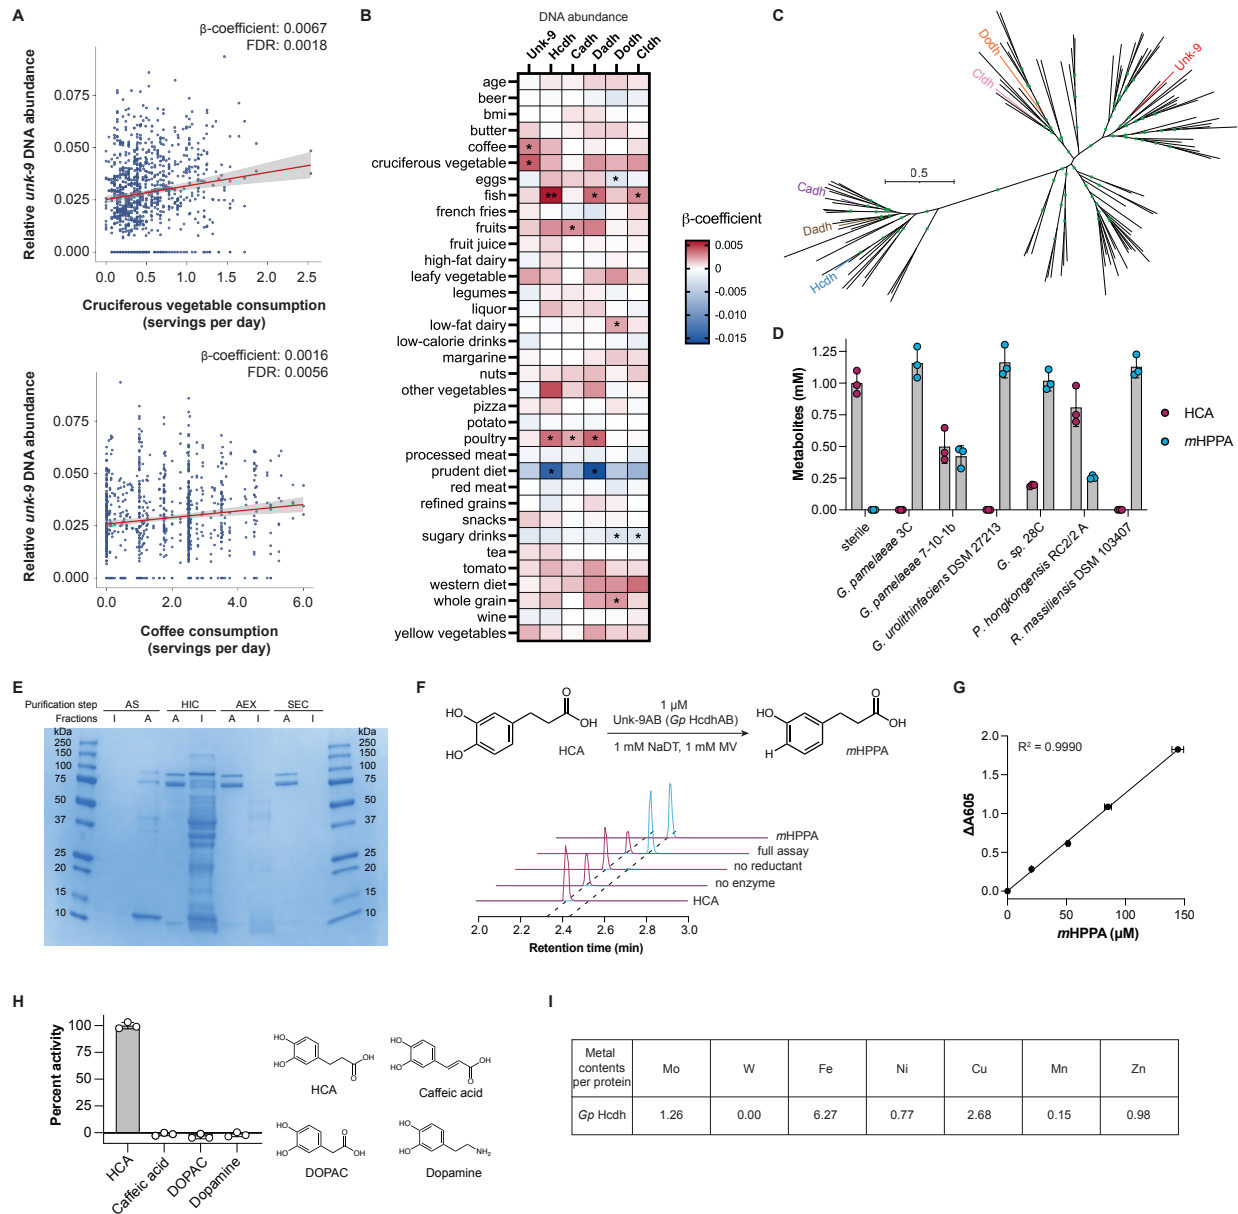

34  
 35 Figure S3. Characterization of Unk-9 enzyme function, related to Figure 3.  
 36 (A) Correlation between the DNA abundance of *Gp Hcdh* and cruciferous vegetable consumption (top panel)  
 37 and coffee consumption (bottom panel). Linear mixed-effects model. (B) Correlations between diet and  
 38 DNA levels of genes encoding the five characterized catechol dehydroxylases and Unk-9 in gut  
 39 metagenomes. Linear mixed-effects model. \*,  $q < 0.10$ ; \*\*,  $q < 0.01$  (C) A maximum-likelihood phylogenetic  
 40 tree of catechol dehydroxylases in the human gut. Branches with bootstrap number  $> 0.9$  are marked by  
 41 green circle. (D) The HCA dehydroxylation activity assay of Unk-9 encoding species ( $n=3$  biologically  
 42 independent replicates, data presented are mean  $\pm$  standard deviation). (E) SDS-PAGE image of active  
 43 and inactive fractions after each purification step of *Gp Hcdh*. AS, ammonium sulfate precipitation; HIC,  
 44 hydrophobic interaction column; AEX, anionic exchange column; SEC, size exclusion column; A, active  
 45 fraction; I, inactive fraction. (F) The *in vitro* activity assays of *Gp Hcdh*. LC-MS/MS mass chromatograms  
 46 of HCA ( $m/z$  181.09  $\rightarrow$  59.03, red line) and *mHPPA* ( $m/z$  165.09  $\rightarrow$  121.10, blue line). 500  $\mu$ M of HCA was  
 47 incubated with 1  $\mu$ M of the purified enzyme, 1 mM MV, and 1 mM NaDT in 250 mM NaCl, 20 mM Tris pH  
 48 7.0 buffer at room temperature for 24 hours. (G) Linear correlation between absorbance at 605 nm  
 49 wavelength and the production of dehydroxylated *mHPPA* quantified by LC-MS/MS. (H) Substrate

50 specificity of *Gp Hcdh*. Percent activity was calculated by comparing 1 min initial rates to that of HCA. (2  
 51 mM substrate, room temperature, 100 nM *Gp Hcdh*, pH 7.0 50 mM MOPS buffer, 300 mM NaCl). (I) Metal  
 52 contents of *Gp Hcdh*.  
 53

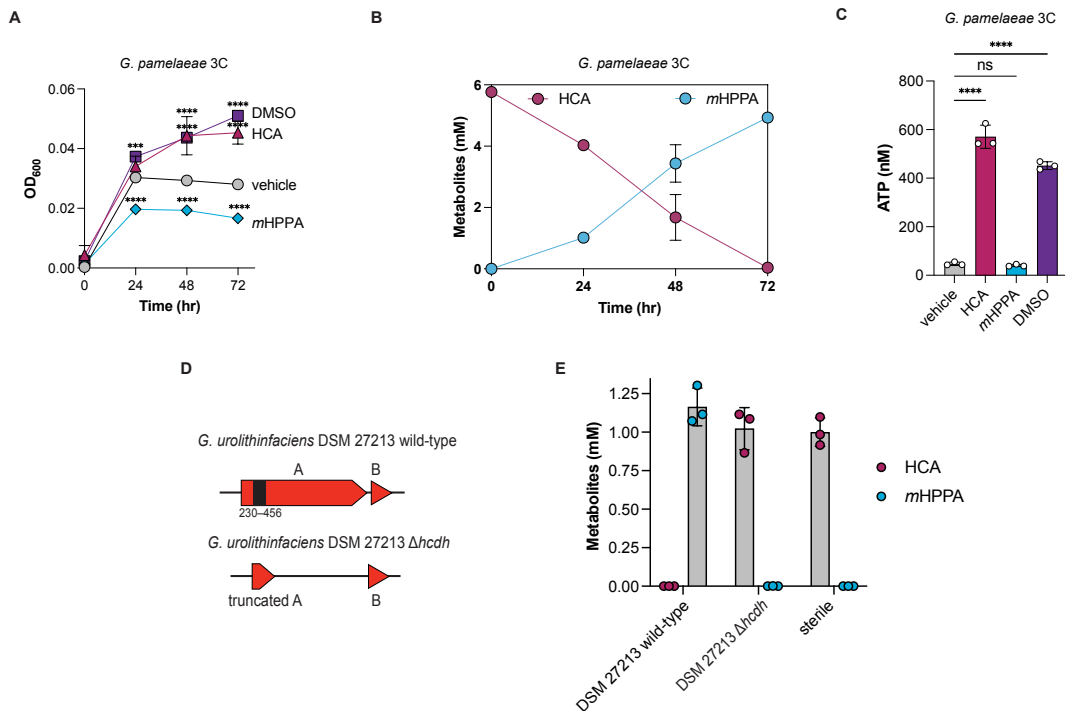

54 Figure S4. A biological role for *Gp Hcdh* activity in *Gordonibacter* host organisms, related to Figure 3.  
 55 (A) The effects of HCA, *mHPPA*, and DMSO on the growth of *G. pamelaeae* 3C under anaerobic conditions  
 57 in 50% BHI medium containing 10 mM sodium formate and additives (vehicle, 5 mM HCA, 5 mM *mHPPA*,  
 58 or 14 mM DMSO). (B) *G. pamelaeae* 3C metabolism of HCA to *mHPPA* measured by LC-MS/MS (C) ATP  
 59 production in response to 1 mM HCA, 1 mM *mHPPA*, and 14 mM DMSO in the cell suspension of *G.*  
 60 *pamelaeae* 3C grown anaerobically with HCA. (D) A frameshift mutation ( $\Delta 230-456$ ) led to the truncation  
 61 of the catalytic subunit A of Hcdh in *G. urolithinfaciens* DSM 27213. (E) The HCA dehydroxylation activity  
 62 assay of the *G. urolithinfaciens* wild-type and  $\Delta hcdh$  strains (A-C and E),  $n=3$  biologically independent  
 63 replicates, data presented are mean  $\pm$  standard deviation. (A and C) One-way ANOVA followed by  
 64 Dunnett's multiple comparisons test with all comparisons made against vehicle control. ns, not significant;  
 65 \*\*\*, adjusted p-value < 0.001; \*\*\*\*, adjusted p-value < 0.0001. HCA, hydrocaffeic acid; *mHPPA*, 3-  
 66 hydroxyphenyl propionic acid; BHI, Brain-Heart Infusion.

67  
 68
